# Supplementary material for: Core–shell structured photovoltaic devices based on PbS quantum dots and silicon nanopillar arrays
Source: Royal Society of Chemistry journal article supplement (doi:10.1039/c2nr11634k), 2012-01-01
Supplement: c2nr11634k.pdf [file c2nr11634k.pdf]

## Supporting Information for

# High Performance Core-shell Structured Photovoltaic Device Based on PbS Quantum Dots and Silicon Nanopillar Arrays

Tao Song<sup>1</sup>, Fute Zhang<sup>1</sup>, Xiaofei Lei<sup>1</sup>, Yonglan Xu<sup>2\*</sup>, Shuitong Lee<sup>3</sup>, Baoquan Sun<sup>1\*</sup>

<sup>1</sup>Jiangsu Key Laboratory for Carbon-Based Functional Materials & Devices, Institute of Functional Nano & Soft Materials (FUNSOM), Soochow University, 199 Ren'ai Road, Suzhou, 215123, China

<sup>2</sup>College of Chemistry, Chemical Engineering and Materials Science, Soochow University, 199 Ren'ai Road, Suzhou, 215123, China

<sup>3</sup>Center of Super-Diamond and Advanced Films (COSDAF) and Department of Physics and Materials Science, City University of Hong Kong, Hong Kong SAR

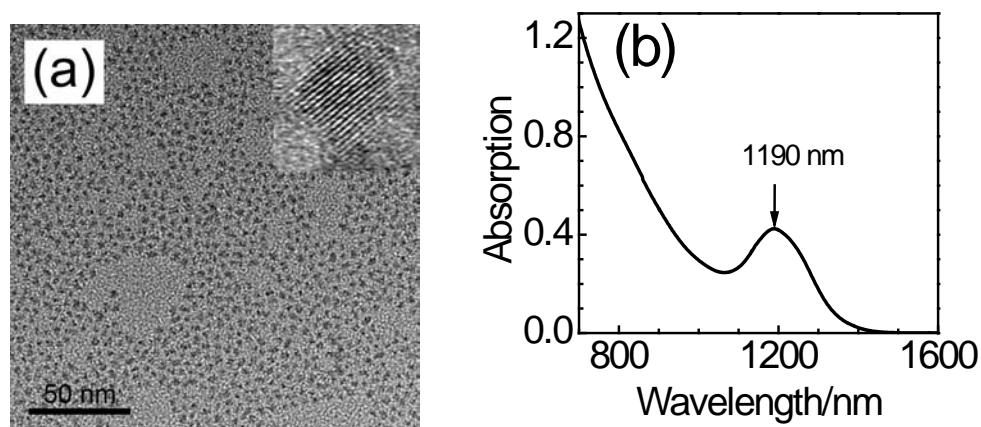

**Figure S1.** (a) TEM image and (b) absorption spectrum of as-synthesized PbS QDs.

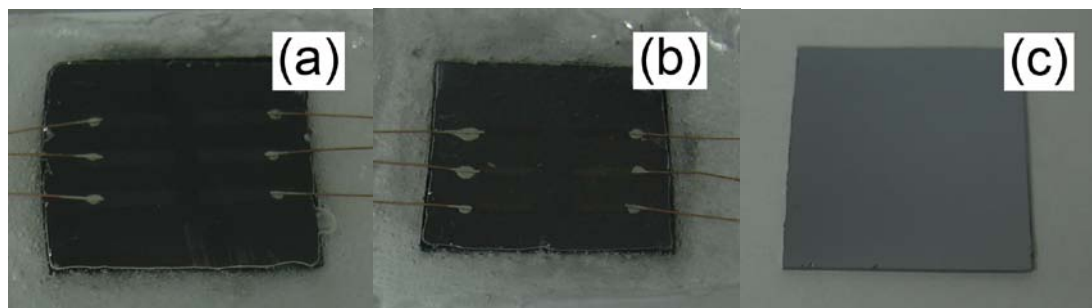

**Figure S2.** Photos of devices made of (a) dense SiNPs and (b) PCl<sub>5</sub> treated sparse SiNPs. Planar silicon is also shown in (c) for comparison.

**Table S1** Electric output characteristics of PbS/silicon nanopillar arrays with different  $\text{PCl}_5$  treatment duration. The concentration of PbS is 15 mg/mL in octane.

| Devices | $V_{oc}$<br>(V) | $J_{sc}$<br>( $\text{mAcm}^{-2}$ ) | FF    | PCE<br>(%) |
|---------|-----------------|------------------------------------|-------|------------|
| W/O     | 0.338           | 0.30                               | 0.358 | 0.036      |
| 1 hour  | 0.395           | 17.5                               | 0.510 | 3.53       |
| 2 hours | 0.428           | 26.4                               | 0.520 | 5.89       |
| 3 hours | 0.423           | 26.0                               | 0.532 | 5.86       |
| 4 hours | 0.432           | 25.1                               | 0.532 | 5.76       |
| 5 hours | 0.438           | 24.5                               | 0.529 | 5.68       |

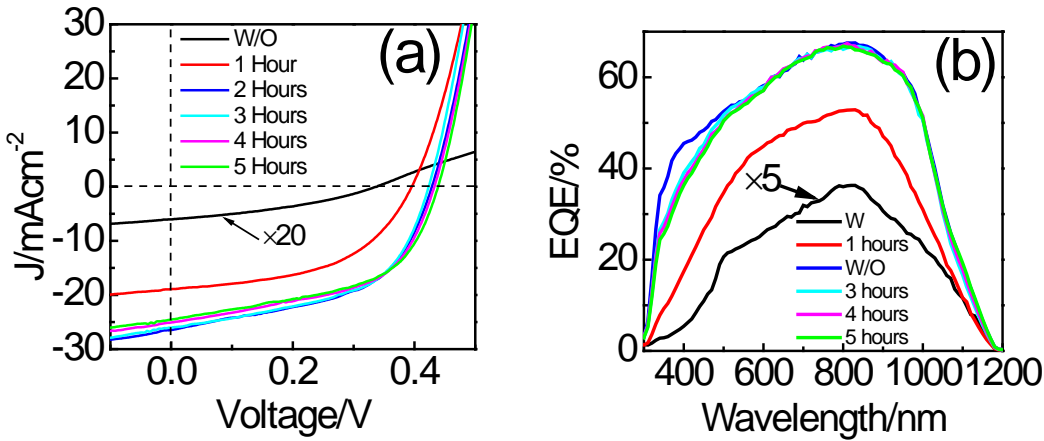

**Figure S3.** IV curve of devices with different  $\text{PCl}_5$  treatment duration under AM 1.5 G light illumination.

**Table S2** Electric output characteristics of PbS/SiNPs with different thickness of PbS. PbS solution with various concentration was used to fabricate the films. The SiNPs are etched in  $\text{PCl}_5$  for 2 hour.

| Devices | $V_{oc}$<br>(V) | $J_{sc}$<br>( $\text{mA/cm}^2$ ) | FF    | PCE<br>(%) |
|---------|-----------------|----------------------------------|-------|------------|
| 0mg*    | 0.050           | 12.5                             | 0.344 | 0.215      |
| 1.25mg  | 0.251           | 17.5                             | 0.534 | 2.35       |
| 2.5mg   | 0.290           | 21.4                             | 0.576 | 3.58       |
| 5mg     | 0.306           | 27.3                             | 0.546 | 4.57       |
| 10mg    | 0.326           | 25.4                             | 0.515 | 4.26       |
| 20mg    | 0.448           | 29.2                             | 0.499 | 6.52       |
| 40mg    | 0.400           | 24.0                             | 0.476 | 4.56       |
| 80mg    | 0.286           | 5.63                             | 0.437 | 0.799      |

\*: without PbS layer.

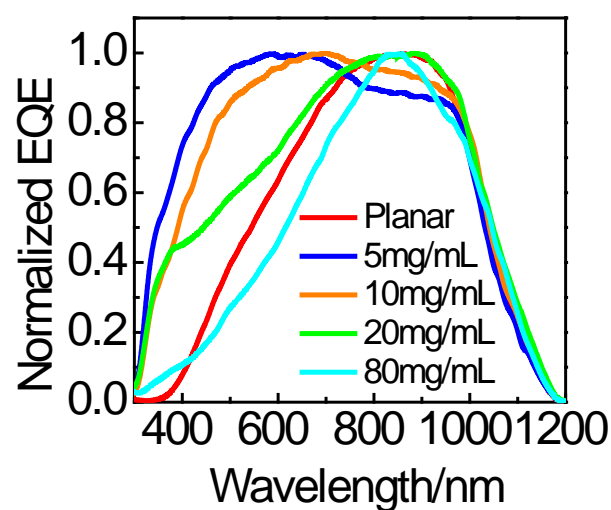

**Figure S4.** Normalized external quantum efficiency of device based on PbS/silicon nanopillar array made by different thickness of PbS. PbS solutions with different concentration was used to fabricate the films.

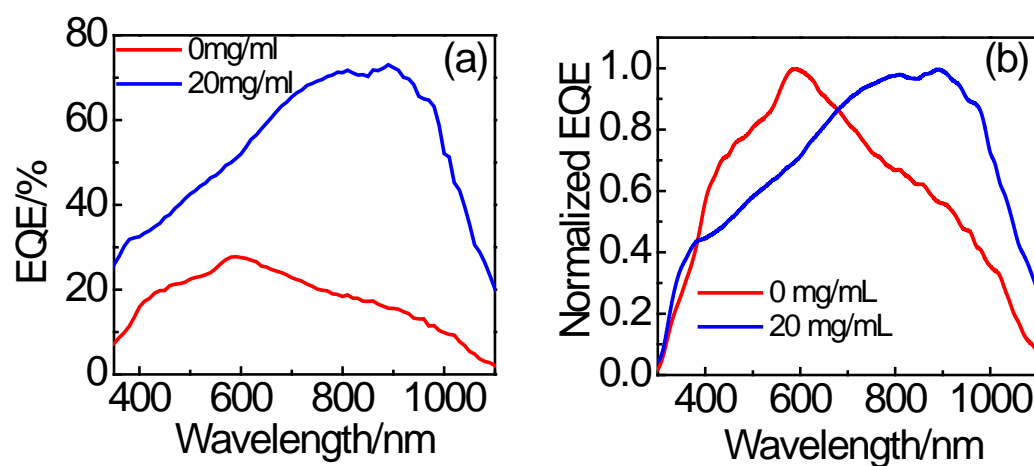

**Figure S5.** (a) External quantum efficiency spectra dependent on wavelength of devices with (20 mg/mL PbS coating ) and without (0 mg/mL) PbS layer. (b) The normalized EQE spectra.
